# Supplementary material for: GenoVi, an open-source automated circular genome visualizer for bacteria and archaea
Source: PLOS journal article supplement (doi:10.1371/journal.pcbi.1010998), 2023-04-04
Supplement: S5 (10.1371/journal.pcbi.1010998.s005) [file journal.pcbi.1010998.s005]

The authors have developed Python command-line application for the visualization circular genome representations of complete and draft genomes of bacteria and archaea. However, there are scope to impoverish the manuscript before acceptance.

Therefore, I recommend major revision as per the following suggestions.

1. Authors should include a comparison table highlighting advantages of their new tool over already exiting tools.

2. I suggest to containerize their software using docker or singularity for portability across machine.
